# Supplementary material for: A Comparative Study on the Biosorption of Cd2+ onto Paecilomyces lilacinus XLA and Mucoromycote sp. XLC
Source: PubMed Central journal article supplement (PMC4519919; doi:10.3390/ijms160715670), 2015-07-10
Supplement: ijms-16-15670-s001.pdf [file ijms-16-15670-s001.pdf]

## Supplementary Information

**Table S1.** Isotherm model constants and regression coefficients for biosorption of Cd<sup>2+</sup> by *Paecilomyces lilacinus* XLA and *Mucoromycote* sp. XLC from aqueous solution.

| Strain | Experiment   | Langmuir Parameters |       |       |
|--------|--------------|---------------------|-------|-------|
|        | $q^a$        | $q_{max}^b$         | $K_L$ | $r^2$ |
| XLA    | 61.89 ± 0.98 | 77.61 ± 0.58        | 0.014 | 0.981 |
| XLC    | 61.94 ± 1.57 | 79.67 ± 1.14        | 0.013 | 0.979 |

<sup>a,b</sup> data was presented as mean value ± standard deviation (SD) ( $n = 3$ ).

**Table S2.** Quantitative results of EDS analysis of XLA before and after Cd<sup>2+</sup> loading.

| Biomass Type | Elements | wt. (%)      | Atomic (%) |
|--------------|----------|--------------|------------|
| XLA-CK       | O        | 71.12 ± 0.70 | 86.36      |
|              | Mg       | 2.57 ± 0.19  | 2.05       |
|              | Si       | 2.90 ± 0.15  | 2.01       |
|              | P        | 6.99 ± 0.25  | 4.38       |
|              | S        | 1.53 ± 0.15  | 0.92       |
|              | Cl       | 1.09 ± 0.13  | 0.60       |
|              | K        | 5.79 ± 0.18  | 2.88       |
|              | Pt       | 8.01 ± 0.69  | 0.80       |
|              | Totals   | 100.00       | 100.00     |
| XLA-Cd       | O        | 70.67 ± 1.00 | 90.51      |
|              | P        | 7.55 ± 0.33  | 5.00       |
|              | S        | 1.65 ± 0.20  | 1.06       |
|              | K        | 0.88 ± 0.20  | 0.46       |
|              | Cd       | 12.41 ± 0.56 | 2.26       |
|              | Pt       | 6.84 ± 0.93  | 0.72       |
|              | Totals   | 100.00       | 100.00     |

**Table S3.** Quantitative results of EDS analysis of XLC before and after Cd<sup>2+</sup> loading.

| Biomass Type | Element | wt. (%)      | Atomic (%) |
|--------------|---------|--------------|------------|
| XLC-CK       | O       | 73.88 ± 0.87 | 89.38      |
|              | P       | 8.54 ± 0.32  | 5.33       |
|              | S       | 2.47 ± 0.21  | 1.49       |
|              | Cl      | 0.74 ± 0.16  | 0.41       |
|              | K       | 4.07 ± 0.20  | 2.01       |
|              | Ca      | 0.93 ± 0.15  | 0.45       |
|              | Pt      | 9.37 ± 0.86  | 0.93       |
|              |         | Totals       | 100.00     |
| XLC-Cd       | O       | 59.33 ± 1.46 | 85.56      |
|              | Si      | 0.87 ± 0.24  | 0.71       |
|              | P       | 9.91 ± 0.52  | 7.38       |
|              | S       | 2.89 ± 0.36  | 2.08       |
|              | Cd      | 12.39 ± 0.84 | 2.54       |
|              | Pt      | 14.62 ± 1.42 | 1.73       |
|              | Totals  | 100.00       | 100.00     |

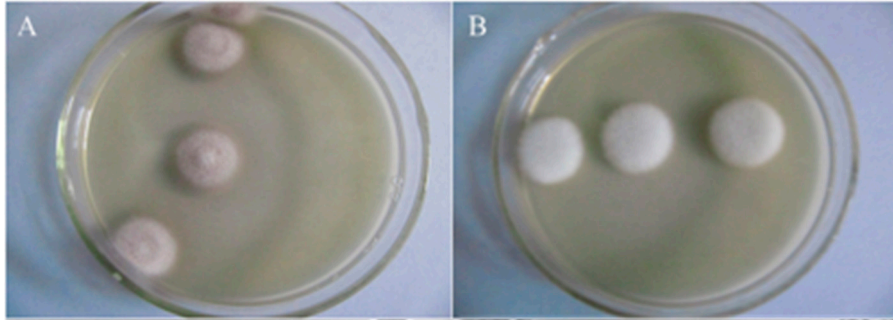

**Figure S1.** Colonial features of filamentous fungi (A) XLA and (B) XLC in potato dextrose agar (PDA) medium.

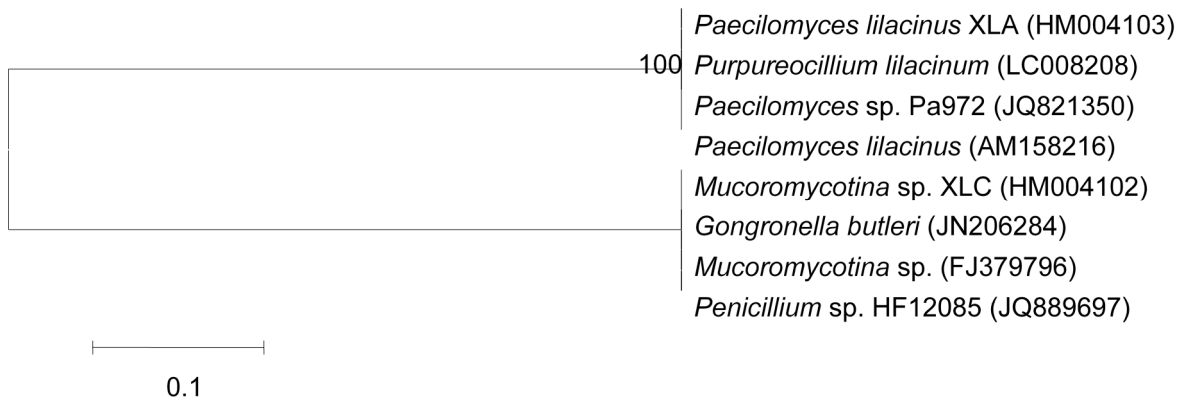

**Figure S2.** Neighbor-joining phylogenetic tree based on a comparison of the ITS1-ITS4 gene sequences of strain XLA, XLC and their closest relative strains. Bootstrap values equal to or greater than 50% are shown, and the scale bar represents the number of substitutions per site. The accession number is shown directly next to the genera name.
